# Supplementary material for: The Electrical Conductivity of Molten Oxide-Fluoride Cryolite Mixtures
Source: MDPI journal article supplement (doi:10.3390/ma14237419), 2021-12-03
Supplement: s1 [file s1]

# The electrical conductivity of molten oxide-fluoride cryolite mixtures

Pavel Arkhipov and Olga Tkacheva

Table S1. Composition and the electrical conductivity of the NaF-AlF<sub>3</sub>-CaF<sub>2</sub>-Al<sub>2</sub>O<sub>3</sub> melts

|    | Composition |                        |                                      | T <sub>liq</sub> , K | κ, S/m·10 <sup>-2</sup> | T, K |
|----|-------------|------------------------|--------------------------------------|----------------------|-------------------------|------|
|    | CR          | CaF <sub>2</sub> , wt% | Al <sub>2</sub> O <sub>3</sub> , wt% |                      |                         |      |
| 1  | 3           | 0                      | 0                                    | 1281                 | 2.95                    | 1330 |
| 2  |             |                        |                                      |                      | 2.94                    | 1326 |
| 3  |             |                        |                                      |                      | 2.93                    | 1320 |
| 4  |             |                        |                                      |                      | 2.91                    | 1314 |
| 5  |             |                        |                                      |                      | 2.89                    | 1308 |
| 6  |             |                        |                                      |                      | 2.84                    | 1293 |
| 7  |             |                        |                                      |                      | 2.80                    | 1283 |
| 8  | 2.7         | 0                      | 0                                    | 1267                 | 2.82                    | 1344 |
| 9  |             |                        |                                      |                      | 2.82                    | 1341 |
| 10 |             |                        |                                      |                      | 2.82                    | 1340 |
| 11 |             |                        |                                      |                      | 2.79                    | 1330 |
| 12 |             |                        |                                      |                      | 2.76                    | 1320 |
| 13 |             |                        |                                      |                      | 2.73                    | 1309 |
| 14 |             |                        |                                      |                      | 2.70                    | 1299 |
| 15 |             |                        |                                      |                      | 2.65                    | 1277 |
| 16 |             |                        |                                      |                      | 2.68                    | 1288 |
| 17 |             |                        |                                      |                      | 2.64                    | 1270 |
| 18 |             |                        |                                      |                      | 2.62                    | 1268 |
| 19 | 2.7         | 5                      | 0                                    | 1234                 | 2.65                    | 1354 |
| 20 |             |                        |                                      |                      | 2.63                    | 1351 |
| 21 |             |                        |                                      |                      | 2.62                    | 1345 |
| 22 |             |                        |                                      |                      | 2.58                    | 1342 |
| 23 |             |                        |                                      |                      | 2.56                    | 1338 |
| 24 |             |                        |                                      |                      | 2.50                    | 1316 |
| 25 |             |                        |                                      |                      | 2.47                    | 1306 |
| 26 |             |                        |                                      |                      | 2.45                    | 1297 |
| 27 |             |                        |                                      |                      | 2.43                    | 1288 |
| 28 |             |                        |                                      |                      | 2.39                    | 1278 |
| 29 |             |                        |                                      |                      | 2.36                    | 1270 |
| 30 | 2.7         | 7                      | 0                                    | 1263                 | 2.45                    | 1334 |
| 31 |             |                        |                                      |                      | 2.44                    | 1325 |
| 32 |             |                        |                                      |                      | 2.42                    | 1319 |
| 33 |             |                        |                                      |                      | 2.40                    | 1312 |
| 34 |             |                        |                                      |                      | 2.38                    | 1303 |
| 35 |             |                        |                                      |                      | 2.35                    | 1294 |
| 36 |             |                        |                                      |                      | 2.31                    | 1285 |
| 37 |             |                        |                                      |                      | 2.28                    | 1276 |
| 38 |             |                        |                                      |                      | 2.25                    | 1268 |
| 39 | 2.5         | 0                      | 0                                    | 1277                 | 2.60                    | 1293 |
| 40 |             |                        |                                      |                      | 2.57                    | 1283 |

|    |     |   |   |      |      |      |
|----|-----|---|---|------|------|------|
| 41 |     |   |   |      | 2.54 | 1277 |
| 42 | 2.5 | 5 | 2 | 1250 | 2.34 | 1293 |
| 43 |     |   |   |      | 2.30 | 1283 |
| 44 |     |   |   |      | 2.28 | 1273 |
| 45 |     |   |   |      | 2.23 | 1265 |
| 46 |     |   |   |      | 2.21 | 1258 |
| 47 | 2.5 | 5 | 6 | 1230 | 2.19 | 1293 |
| 48 |     |   |   |      | 2.18 | 1285 |
| 49 |     |   |   |      | 2.15 | 1275 |
| 50 |     |   |   |      | 2.10 | 1263 |
| 51 |     |   |   |      | 2.07 | 1255 |
| 52 |     |   |   |      | 2.03 | 1244 |
| 53 |     |   |   |      | 2.03 | 1239 |
| 54 | 2.4 | 0 | 0 | 1255 | 2.55 | 1293 |
| 55 |     |   |   |      | 2.52 | 1285 |
| 56 |     |   |   |      | 2.49 | 1275 |
| 57 |     |   |   |      | 2.46 | 1263 |
| 58 |     |   |   |      | 2.55 | 1255 |
| 59 | 2.4 | 7 | 4 | 1217 | 2.36 | 1293 |
| 60 |     |   |   |      | 2.33 | 1288 |
| 61 |     |   |   |      | 2.26 | 1269 |
| 62 |     |   |   |      | 2.18 | 1252 |
| 63 |     |   |   |      | 2.17 | 1255 |
| 64 |     |   |   |      | 2.16 | 1249 |
| 65 |     |   |   |      | 2.11 | 1236 |
| 66 |     |   |   |      | 2.09 | 1226 |
| 67 |     |   |   |      | 2.05 | 1217 |
| 68 | 2.4 | 7 | 8 | 1196 | 2.29 | 1323 |
| 69 |     |   |   |      | 2.27 | 1320 |
| 70 |     |   |   |      | 2.23 | 1315 |
| 71 |     |   |   |      | 2.21 | 1310 |
| 72 |     |   |   |      | 2.20 | 1302 |
| 73 |     |   |   |      | 2.18 | 1293 |
| 74 |     |   |   |      | 2.13 | 1285 |
| 75 |     |   |   |      | 2.10 | 1276 |
| 76 |     |   |   |      | 2.06 | 1268 |
| 77 |     |   |   |      | 2.04 | 1259 |
| 78 |     |   |   |      | 2.00 | 1251 |
| 79 |     |   |   |      | 1.99 | 1244 |
| 80 |     |   |   |      | 1.97 | 1235 |
| 81 |     |   |   |      | 1.93 | 1226 |
| 82 |     |   |   |      | 1.88 | 1208 |
| 83 |     |   |   |      | 1.82 | 1196 |
| 84 | 2.3 | 0 | 0 | 1258 | 2.47 | 1283 |
| 85 |     |   |   |      | 2.44 | 1273 |
| 86 |     |   |   |      | 2.41 | 1263 |
| 87 |     |   |   |      | 2.38 | 1258 |
| 88 | 2.3 | 5 | 0 | 1248 | 2.22 | 1285 |
| 89 |     |   |   |      | 2.14 | 1262 |
| 90 |     |   |   |      | 2.10 | 1248 |
| 91 | 2.3 | 5 | 2 | 1234 | 2.20 | 1283 |
| 92 |     |   |   |      | 2.16 | 1273 |
| 93 |     |   |   |      | 2.13 | 1263 |

|     |     |   |   |      |      |      |
|-----|-----|---|---|------|------|------|
| 94  |     |   |   |      | 2.10 | 1253 |
| 95  | 2.3 | 5 | 4 | 1223 | 2.39 | 1293 |
| 96  |     |   |   |      | 2.35 | 1283 |
| 97  |     |   |   |      | 2.32 | 1273 |
| 98  |     |   |   |      | 2.29 | 1263 |
| 99  |     |   |   |      | 2.26 | 1253 |
| 100 |     |   |   |      | 2.22 | 1243 |
| 101 |     |   |   |      | 2.19 | 1233 |
| 102 | 2.3 | 5 | 6 | 1211 | 2.15 | 1293 |
| 103 |     |   |   |      | 2.14 | 1283 |
| 104 |     |   |   |      | 2.07 | 1265 |
| 105 |     |   |   |      | 2.03 | 1254 |
| 106 |     |   |   |      | 2.00 | 1246 |
| 107 |     |   |   |      | 1.99 | 1238 |
| 108 |     |   |   |      | 1.96 | 1235 |
| 109 | 2.1 | 0 | 0 | 1244 | 2.39 | 1282 |
| 110 |     |   |   |      | 2.33 | 1263 |
| 111 |     |   |   |      | 2.25 | 1248 |
| 112 | 2.1 | 5 | 0 | 1236 | 2.19 | 1293 |
| 113 |     |   |   |      | 2.16 | 1283 |
| 114 |     |   |   |      | 2.13 | 1273 |
| 115 |     |   |   |      | 2.10 | 1263 |
| 116 |     |   |   |      | 2.06 | 1253 |
| 117 |     |   |   |      | 2.03 | 1243 |
| 118 |     |   |   |      | 2.00 | 1236 |
| 119 | 2.1 | 5 | 3 | 1213 | 2.08 | 1293 |
| 120 |     |   |   |      | 2.06 | 1282 |
| 121 |     |   |   |      | 2.01 | 1263 |
| 122 |     |   |   |      | 1.97 | 1248 |
| 123 |     |   |   |      | 1.93 | 1236 |
| 124 |     |   |   |      | 1.91 | 1228 |
| 125 |     |   |   |      | 1.90 | 1223 |
| 126 |     |   |   |      | 1.88 | 1218 |
| 127 | 2.1 | 5 | 6 | 1197 | 2.08 | 1293 |
| 128 |     |   |   |      | 2.06 | 1282 |
| 129 |     |   |   |      | 2.01 | 1263 |
| 130 |     |   |   |      | 1.97 | 1248 |
| 131 |     |   |   |      | 1.93 | 1236 |
| 132 |     |   |   |      | 1.91 | 1228 |
| 133 |     |   |   |      | 1.90 | 1223 |
| 134 |     |   |   |      | 1.88 | 1218 |
